# Supplementary material
Source: publisher figshare collection journal article supplement (https://diabetesjournals.figshare.com/ndownloader/files/32063855)
Supplement: Supplementary file 1 [file 32063855]

**Supplementary Table S1. Concomitant medication usage at baseline and postbaseline in the dulaglutide and placebo groups.**

| <b>Antihyperglycemic agent</b> | <b>Baseline</b>       |                   |         | <b>Postbaseline</b>   |                   |         |
|--------------------------------|-----------------------|-------------------|---------|-----------------------|-------------------|---------|
|                                | Dulaglutide<br>N=4939 | Placebo<br>N=4937 | P-value | Dulaglutide<br>N=4939 | Placebo<br>N=4937 | P-value |
| Metformin                      | 4013 (81.3)           | 4003 (81.1)       | 0.829   | 4221 (85.5)           | 4319 (87.5)       | <0.001  |
| Sulfonylurea                   | 2266 (45.9)           | 2278 (46.1)       | 0.794   | 2531 (51.2)           | 2802 (56.8)       | <0.001  |
| Insulin                        | 1186 (24.0)           | 1173 (23.8)       | 0.768   | 1683 (34.1)           | 2079 (42.1)       | <0.001  |
| DPP-4 inhibitors               | 266 (5.4)             | 298 (6.0)         | 0.164   | 435 (8.8)             | 713 (14.4)        | <0.001  |
| SGLT-2 inhibitors              | 2 (0)                 | 1 (0)             | >0.999  | 344 (7.0)             | 487 (9.9)         | <0.001  |
| Thiazolidinediones             | 99 (2.0)              | 66 (1.3)          | 0.010   | 147 (3.0)             | 184 (3.7)         | <0.001  |
| Other glucose-lowering drugs   | 20 (0.4)              | 25 (0.5)          | 0.454   | 42 (0.9)              | 42 (0.9)          | 0.447   |

Data presented as n (%). Post-baseline medication use was defined as concomitant medications continued or added following randomization at any time during treatment.

Abbreviations: DPP-4 = dipeptidyl peptidase-4; N = total number of patients in each treatment group; n = number of patients in each category; SGLT-2i = sodium-glucose co-transporter 2 inhibitor.

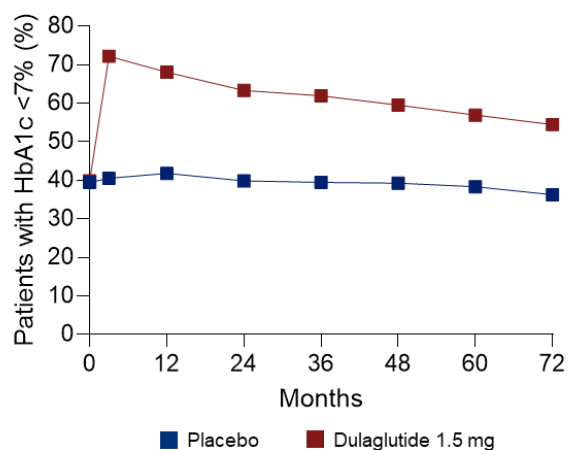

|          | Placebo<br>n/N | Dulaglutide<br>n/N |
|----------|----------------|--------------------|
| Baseline | 1949/4937      | 1972/4939          |
| Month 3  | 1943/4787      | 3430/4751          |
| 12       | 1907/4560      | 3129/4595          |
| 24       | 1708/4280      | 2780/4388          |
| 36       | 1621/4107      | 2599/4195          |
| 48       | 1547/3936      | 2400/4030          |
| 60       | 1437/3745      | 2211/3882          |
| 72       | 444/1222       | 683/1254           |

**Supplementary Figure S1.** The percentage of patients achieving HbA1c <7% was higher at each timepoint in the dulaglutide group than the placebo group. Percentages were calculated using the number of patients with HbA1c <7% (n) as a proportion of the number of patients in each treatment group eligible for follow-up at each annual visit after excluding deceased patients (N).

Abbreviations: HbA1c = glycated hemoglobin.
